# Supplementary material for: Gender differences in the prevalence of mental distress in East and West Germany over time: a hierarchical age-period-cohort analysis, 2006–2021
Source: Springer Nature journal article supplement (doi:10.1007/s00127-023-02479-z), 2023-04-11
Supplement: MOESM1 [file 25224784]

**Supplementary Table S1. Response rate for all included surveys.**

| Survey year | Recruitment in/between                    | initially selected | response rate | final sample | ethics approval number |
|-------------|-------------------------------------------|--------------------|---------------|--------------|------------------------|
| 2006        | July 2006                                 | 8106               | 62.1          | 5036         |                        |
| 2010        | January 2010                              | 4069               | 61.5          | 2520         |                        |
| 2013        | June and July 2013                        | 4360               | 57.5          | 2508         | 050/13-11032013        |
| 2014        | February and March 2014                   | 4607               | 54.8          | 2527         | 063-14-10032014        |
| 2016        | January-March 2016                        | 4830               | 52.3          | 2524         | 452-15-21122015        |
| 2017        | November 2017-January 2018 (80% in 2017)  | 5160               | 49.1          | 2531         | 418/17-ek              |
| 2018        | Mai-July 2018                             | 5418               | 46.4          | 2516         | 132/18-ek              |
| 2019        | Mai-July 2019                             | 5393               | 46.9          | 2531         | 145/19-ek              |
| 2020        | April-June 2020                           | 5418               | 47.3          | 2503         | 043/20-ek              |
| 2021        | December 2020-February 2021 (85% in 2021) | 5902               | 40.0          | 2519         | 474/20-ek              |

*Note:* Random-Route-procedure to select participants (using Kish-Selection-Grid to select random household and target person). Addresses no one was home after multiple visits from interviewer, persons refusing to participate or persons unable to participate (illness, vacation and so on) or breaking off the interview lead to final sample.

**Supplementary Table S2a. Mental distress over time for the overall sample and stratified by gender and region.**

|      | Total     | Gender    |           |                 | Region    |           |                 |
|------|-----------|-----------|-----------|-----------------|-----------|-----------|-----------------|
|      |           | men       | women     | <i>p</i> -value | west      | east      | <i>p</i> -value |
| 2006 | 1.76±2.06 | 1.57±1.97 | 1.93±2.12 | <.001           | 1.69±1.99 | 2.04±2.29 | <.001           |
| 2010 | 1.45±2.15 | 1.32±2.12 | 1.56±2.17 | <.01            | 1.33±2.05 | 1.91±2.46 | <.001           |
| 2013 | 1.74±2.29 | 1.46±2.09 | 2.00±2.42 | <.001           | 1.71±2.25 | 1.87±2.43 | .200            |
| 2014 | 1.71±2.18 | 1.50±2.07 | 1.90±2.25 | <.001           | 1.73±2.20 | 1.63±2.05 | .333            |
| 2016 | 1.42±2.18 | 1.21±2.01 | 1.59±2.31 | <.001           | 1.36±2.18 | 1.64±2.20 | <.05            |
| 2017 | 2.05±2.42 | 1.73±2.19 | 2.31±2.57 | <.001           | 2.08±2.40 | 1.95±2.51 | .300            |
| 2018 | 1.67±2.21 | 1.54±2.19 | 1.77±2.22 | <.05            | 1.66±2.22 | 1.70±2.19 | .698            |
| 2019 | 1.57±2.13 | 1.38±2.02 | 1.73±2.20 | <.001           | 1.66±2.17 | 1.21±1.92 | <.001           |
| 2020 | 2.18±2.31 | 1.91±2.17 | 2.41±2.40 | <.001           | 2.17±2.30 | 2.21±2.34 | .721            |
| 2021 | 1.41±2.10 | 1.26±1.99 | 1.55±2.18 | <.001           | 1.46±2.09 | 1.22±2.10 | <.05            |

*Note:* Reported are the mean value with standard deviation (M±SD).

**Supplementary Table S2b. Mental distress across age groups for the overall sample and stratified by gender and region.**

|             | Total     | Gender    |           |                 | Region    |           |                 |
|-------------|-----------|-----------|-----------|-----------------|-----------|-----------|-----------------|
|             |           | men       | women     | <i>p</i> -value | west      | east      | <i>p</i> -value |
| <25 years   | 1.62±2.16 | 1.32±1.94 | 1.90±2.32 | <.001           | 1.62±2.18 | 1.59±2.08 | .777            |
| 25-34 years | 1.58±2.12 | 1.31±1.92 | 1.82±2.26 | <.001           | 1.59±2.12 | 1.54±2.16 | .565            |
| 35-44 years | 1.55±2.14 | 1.36±1.98 | 1.71±2.25 | <.001           | 1.54±2.11 | 1.64±2.27 | .258            |
| 45-54 years | 1.73±2.20 | 1.62±2.16 | 1.81±2.23 | <.010           | 1.71±2.16 | 1.81±2.36 | .240            |
| 55-64 years | 1.78±2.28 | 1.66±2.25 | 1.88±2.29 | <.010           | 1.75±2.25 | 1.87±2.36 | .187            |
| 65-74 years | 1.64±2.11 | 1.41±1.98 | 1.86±2.21 | <.001           | 1.66±2.15 | 1.59±2.01 | .357            |
| >74 years   | 2.24±2.47 | 1.90±2.33 | 2.46±2.54 | <.001           | 2.17±2.39 | 2.42±2.67 | .055            |

*Note:* Reported are the mean value with standard deviation (M±SD).

**Supplementary Table S2c. Mental distress across cohorts for the overall sample and stratified by gender and region.**

|           | Total     | Gender    |           |                 | Region    |           |                 |
|-----------|-----------|-----------|-----------|-----------------|-----------|-----------|-----------------|
|           |           | men       | women     | <i>p</i> -value | west      | east      | <i>p</i> -value |
| <1946     | 1.99±2.33 | 1.66±2.18 | 2.26±2.41 | <.001           | 1.96±2.29 | 2.10±2.42 | .078            |
| 1946-1959 | 1.70±2.18 | 1.59±2.12 | 1.81±2.22 | <.001           | 1.68±2.17 | 1.78±2.21 | .168            |
| 1960-1969 | 1.71±2.22 | 1.57±2.18 | 1.83±2.24 | <.001           | 1.69±2.18 | 1.81±2.37 | .140            |
| 1970-1980 | 1.54±2.10 | 1.37±1.95 | 1.69±2.21 | <.001           | 1.54±2.08 | 1.54±2.20 | .935            |
| >1980     | 1.60±2.18 | 1.32±1.96 | 1.86±2.33 | <.001           | 1.62±2.19 | 1.54±2.13 | .241            |

*Note:* Reported are the mean value with standard deviation (M±SD).

**Supplementary Table S3. Multi-group factor analyses for survey year, cohort and age groups.**

|                                    | $\chi^2$ | df | $\Delta \chi^2$ | p     | CFI   | $\Delta$ CFI | SRMR  |
|------------------------------------|----------|----|-----------------|-------|-------|--------------|-------|
| <i>Survey year (period)</i>        |          |    |                 |       |       |              |       |
| Configural                         | 982.742  | 20 | ---             | <.001 | 0.981 | ---          | 0.020 |
| Metric                             | 1246.533 | 47 | 263.791         | <.001 | 0.976 | -0.005       | 0.036 |
| Scalar                             | 1592.580 | 74 | 346.047         | <.001 | 0.970 | -0.006       | 0.041 |
| <i>Generations (birth cohorts)</i> |          |    |                 |       |       |              |       |
| Configural                         | 911.343  | 10 | ---             | <.001 | 0.982 | ---          | 0.020 |
| Metric                             | 956.291  | 22 | 44.948          | <.001 | 0.981 | -0.001       | 0.023 |
| Scalar                             | 992.348  | 34 | 36.057          | <.001 | 0.981 | 0.000        | 0.024 |
| <i>Age groups</i>                  |          |    |                 |       |       |              |       |
| Configural                         | 886.670  | 14 | ---             | <.001 | 0.982 | ---          | 0.019 |
| Metric                             | 923.605  | 32 | 36.935          | <.001 | 0.982 | 0.000        | 0.022 |
| Scalar                             | 970.217  | 50 | 46.612          | <.001 | 0.981 | -0.001       | 0.023 |

*Note:* df = degrees of freedom; CFI = Comparative Fit Index; TLI =Tucker-Lewis Index, SRMR=Standardized Root Mean Square.
